# Supplementary material
Source: PubMed Central journal article supplement (PMC5533302)
Supplement: NIHMS877937-supplement-1.pdf [file NIHMS877937-supplement-1.pdf]

| Sample ID                                 | Proctor PCR Results | DNA                   | DNA-seq Results        | nt RM (sp) | Stanford PCR Results   |
|-------------------------------------------|---------------------|-----------------------|------------------------|------------|------------------------|
|                                           |                     | concentration (ng/μL) |                        |            |                        |
| <b>Positive Reference PCR Samples</b>     |                     |                       |                        |            |                        |
| 22                                        | CMV                 | 0.102                 | CMV                    | 4.362      | NA                     |
| 28                                        | CMV                 | <0.05                 | CMV                    | 537.635    | NA                     |
| 34                                        | CMV                 | 0.108                 | CMV                    | 713.308    | NA                     |
| 40                                        | CMV                 | <0.05                 | CMV                    | 21.663     | NA                     |
| 62                                        | CMV                 | 0.176                 | CMV                    | 16.184     | NA                     |
| 65                                        | CMV                 | <0.05                 | CMV                    | 286.589    | NA                     |
| 71                                        | CMV                 | 2.66                  | CMV                    | 727.388    | NA                     |
| 74                                        | CMV                 | 0.134                 | CMV                    | 982.894    | NA                     |
| 42                                        | HSV-1               | 1.06                  | HSV-1                  | 10.443     | NA                     |
| 17                                        | HSV-2               | 0.956                 | HSV-2                  | 3.751      | NA                     |
| 23                                        | HSV-2               | 0.682                 | HSV-2                  | 100.162    | NA                     |
| 36                                        | HSV-2               | 0.164                 | HSV-2                  | 40.482     | NA                     |
| 38                                        | HSV-2               | 0.100                 | HSV-2                  | 0.427      | NA                     |
| 47                                        | HSV-2               | 2.32                  | HSV-2                  | 49.161     | NA                     |
| 64                                        | HSV-2               | <0.05                 | HSV-2                  | 0.109      | NA                     |
| 15                                        | <i>T. gondii</i>    | 1.90                  | <i>T. gondii</i>       | 34.936     | NA                     |
| 25*                                       | <i>T. gondii</i>    | 0.140                 | Negative               | NA         | <i>T. gondii</i>       |
| 30                                        | <i>T. gondii</i>    | <0.05                 | <i>T. gondii</i>       | 49.609     | NA                     |
| 41                                        | <i>T. gondii</i>    | 0.134                 | <i>T. gondii</i>       | 0.171      | NA                     |
| 50                                        | <i>T. gondii</i>    | <0.05                 | <i>T. gondii</i>       | 0.653      | NA                     |
| 54*                                       | <i>T. gondii</i>    | 1.24                  | Negative               | NA         | <i>T. gondii</i>       |
| 57                                        | <i>T. gondii</i>    | 0.180                 | <i>T. gondii</i>       | 256.063    | NA                     |
| 60*                                       | <i>T. gondii</i>    | 0.178                 | Negative               | NA         | <i>T. gondii</i>       |
| 14                                        | VZV                 | 0.538                 | VZV                    | 0.41       | NA                     |
| 27                                        | VZV                 | <0.05                 | VZV                    | 19.32      | NA                     |
| 29                                        | VZV                 | 4.16                  | VZV                    | 8.395      | NA                     |
| 32                                        | VZV                 | 0.160                 | VZV                    | 125.516    | NA                     |
| 43                                        | VZV                 | 3.92                  | VZV                    | 2.585      | NA                     |
| 44*                                       | VZV                 | 0.126                 | Negative               | NA         | VZV                    |
| 48                                        | VZV                 | 1.01                  | VZV                    | 1.214      | NA                     |
| 66                                        | VZV                 | 0.128                 | VZV                    | 1.181      | NA                     |
| <b>Pan-Negative Reference PCR Samples</b> |                     |                       |                        |            |                        |
| 4                                         | Pan-Negative        | <0.05                 | Negative               | NA         | NA                     |
| 5                                         | Pan-Negative        | <0.05                 | Negative               | NA         | NA                     |
| 11                                        | Pan-Negative        | <0.05                 | Negative               | NA         | NA                     |
| 12                                        | Pan-Negative        | 5.06                  | Negative               | NA         | NA                     |
| 13                                        | Pan-Negative        | <0.05                 | Negative               | NA         | NA                     |
| 16                                        | Pan-Negative        | <0.05                 | Negative               | NA         | NA                     |
| 18*                                       | Pan-Negative        | <0.05                 | <i>C. dubliniensis</i> | 33.99      | <i>C. dubliniensis</i> |
| 21                                        | Pan-Negative        | 0.170                 | Negative               | NA         | NA                     |
| 24                                        | Pan-Negative        | <0.05                 | Negative               | NA         | NA                     |
| 26                                        | Pan-Negative        | <0.05                 | Negative               | NA         | NA                     |
| 31                                        | Pan-Negative        | 0.378                 | Negative               | NA         | NA                     |
| 33                                        | Pan-Negative        | <0.05                 | Negative               | NA         | NA                     |
| 35                                        | Pan-Negative        | <0.05                 | Negative               | NA         | NA                     |
| 37                                        | Pan-Negative        | <0.05                 | Negative               | NA         | NA                     |
| 39*                                       | Pan-Negative        | <0.05                 | HSV-2                  | 0.064      | NDET                   |
| 45                                        | Pan-Negative        | <0.05                 | Negative               | NA         | NA                     |
| 46                                        | Pan-Negative        | <0.05                 | Negative               | NA         | NA                     |
| 49                                        | Pan-Negative        | <0.05                 | Negative               | NA         | NA                     |
| 51                                        | Pan-Negative        | 0.692                 | Negative               | NA         | NA                     |
| 52                                        | Pan-Negative        | <0.05                 | Negative               | NA         | NA                     |
| 53*                                       | Pan-Negative        | <0.05                 | CMV                    | 0.045      | NDET                   |
| 55*                                       | Pan-Negative        | <0.05                 | CMV                    | 1123.4     | CMV                    |
| 56                                        | Pan-Negative        | <0.05                 | Negative               | NA         | NA                     |
| 58                                        | Pan-Negative        | <0.05                 | Negative               | NA         | NA                     |
| 59                                        | Pan-Negative        | 0.388                 | Negative               | NA         | NA                     |
| 61                                        | Pan-Negative        | 0.180                 | Negative               | NA         | NA                     |
| 63*                                       | Pan-Negative        | <0.05                 | HTLV-1                 | 0.111      | HTLV-1                 |
| 67                                        | Pan-Negative        | 0.326                 | Negative               | NA         | NA                     |
| 68*                                       | Pan-Negative        | <0.05                 | HHV-6                  | 2.79       | HHV-6                  |
| 69                                        | Pan-Negative        | <0.05                 | Negative               | NA         | NA                     |
| 70*                                       | Pan-Negative        | 0.554                 | HHV-6                  | 2.583      | HHV-6                  |
| 72                                        | Pan-Negative        | 0.126                 | Negative               | NA         | NA                     |
| 73                                        | Pan-Negative        | <0.05                 | Negative               | NA         | NA                     |
| 75*                                       | Pan-Negative        | 1.43                  | <i>K. pneumoniae</i>   | 9446.854   | <i>K. pneumoniae</i>   |
| 76                                        | Pan-Negative        | <0.05                 | Negative               | NA         | NA                     |
| 77                                        | Pan-Negative        | <0.05                 | Negative               | NA         | NA                     |

**Table S1: Result Summary for Positive and Pan-negative Reference PCR Samples. (\*) Indicates discrepant samples. Abbreviations: matched read pairs per million read pairs (RM) at the species level**

based on nucleotide (nt) alignment, nt RM (sp); not applicable, NA; not detected, NDET; *Toxoplasma gondii*, *T. gondii*; *Candida dubliniensis*, *C. dubliniensis*; *Klebsiella pneumoniae*, *K. pneumoniae*.
