# Supplementary material
Source: PubMed Central journal article supplement (PMC5533302)
Supplement: NIHMS877937-supplement-2.pdf [file NIHMS877937-supplement-2.pdf]

| Sample ID | Gene name | Drug resistance mutations | Predicted drug resistance pattern |
|-----------|-----------|---------------------------|-----------------------------------|
| 28        | UL97      | None                      |                                   |
|           | UL54      | None                      |                                   |
| 34        | UL97      | None                      |                                   |
|           | UL54      | None                      |                                   |
| 40        | UL97      | None                      |                                   |
|           | UL54      | None                      |                                   |
| 62        | UL97      | None                      |                                   |
|           | UL54      | None                      |                                   |
| 65        | UL97      | C592G                     | Ganciclovir resistant             |
|           | UL54      | None                      |                                   |
| 71        | UL97      | C592G                     | Ganciclovir resistant             |
| 74        | UL97      | C592G, L595S              | Ganciclovir resistant             |

**Table S2: CMV Drug Resistance Mutations Detected in Banked Vitreous Samples.** Abbreviations: cytomegalovirus, CMV; phosphotransferase, UL97; DNA polymerase, UL54.
